1 **Full title**

2 The association between limiting longstanding illness and serious psychological distress in  
3 adolescents: A secondary analysis of the UK Millennium Cohort Study

4

5 **Short title**

6 Limiting longstanding illness and serious psychological distress in UK adolescents

7

8 Gareth M. Palliser<sup>1\*</sup>, Lorna K. Fraser<sup>2</sup>, Kate E. Mooney<sup>1,3</sup>, and Stuart W. Jarvis<sup>1</sup>

9

10 <sup>1</sup> Department of Health Sciences, University of York, York, UK

11 <sup>2</sup> Cicely Saunders Institute, King's College London, London, UK

12 <sup>3</sup> Better Start Bradford Innovation Hub, Bradford Institute for Health Research

13

14 \*Corresponding author

15 E-mail: [gareth.palliser@york.ac.uk](mailto:gareth.palliser@york.ac.uk)

16

17

18

19

**NOTE: This preprint reports new research that has not been certified by peer review and should not be used to guide clinical practice.**

20 **Abstract**

21 **Background**

22 Previous studies have shown associations between specific limiting longstanding illnesses and  
23 mental health difficulties using cross-sectional studies in the UK. This study explored the  
24 association between having any limiting longstanding illness and serious psychological  
25 distress or of currently receiving treatment for depression or serious anxiety at age 17 years.

26 **Methods**

27 A secondary analysis of the UK Millennium Cohort Study was conducted. Outcome measures  
28 were dichotomised responses from the self-administered Kessler-6 questionnaire for  
29 nonspecific psychological distress, and self-reported currently receiving treatment for  
30 depression or serious anxiety. Limiting longstanding illness data and covariates were taken  
31 from questionnaires with parents and adolescents, from birth up to age 17 years. Data were  
32 analysed using multiple binary logistic regression, first using complete-case analysis, and then  
33 using multiple imputation using chained equations.

34 **Results**

35 Adolescents with a history of limiting longstanding illness were at an increased odds of both  
36 serious psychological distress (odds ratio = 1.53, 95%CI = 1.27-1.86) and self-reporting  
37 currently receiving treatment for depression or serious anxiety at age 17 years (odds ratio =  
38 3.02, 95%CI 2.24-4.07).

39 **Conclusion**

40 Children and young people with a limiting longstanding illness are at increased risk of having  
41 serious psychological distress, depression, and serious anxiety. Practitioners should be aware  
42 of this and routine screening for psychological distress, plus additional preventative support,  
43 may be beneficial.

44

## 45 Introduction

46 Adolescence marks the period between childhood and adulthood, representing a key period  
47 in both physical and psychological development. National UK survey data found a prevalence  
48 of probable mental illness of 17.6% in those aged 6-16 years old in England<sup>[1]</sup>, compared with  
49 16.7% in adults in similar surveys <sup>[2]</sup>. Recently, mental health disorders for children and  
50 adolescents have become a public health crisis in England. Child referrals to mental health  
51 services more than doubled between 2020 and 2021<sup>[3]</sup>, and one in every five children aged 8-  
52 16 years old now experiences a mental health disorder<sup>[4]</sup>. A previous analysis of US national  
53 survey data <sup>[5]</sup> found that half of lifetime mental health disorders in the Diagnostic and  
54 Statistical Manual of Mental Disorders (DSM-IV)<sup>[6]</sup> start by 14 years of age, and three-quarters  
55 occur by 24 years. Adolescent mental illness is therefore a critical period for research. Mental  
56 illness experienced in adolescence is associated with significant potential harms including  
57 lower educational achievement <sup>[7]</sup>, alcohol and substance misuse <sup>[8]</sup>, social isolation <sup>[9]</sup>, and  
58 suicide and self-inflicted injury <sup>[10]</sup>.

59 Longstanding illness is defined by The UK Department of Health <sup>[11]</sup> as any illness or condition  
60 which cannot be cured, but can instead be treated with pharmacological or other treatments;  
61 it is limiting if it reduces the ability of someone to take part in normal activities. As medical  
62 care improves, childhood mortality rates in those aged 1 to 15 years in England and Wales  
63 have decreased from 33 deaths per 100,000 in 1981 to 8 deaths per 100,000 in 2021<sup>[12]</sup>. This,  
64 amongst other factors including a rise in sedentary lifestyles, has resulted in a global rise in  
65 the proportion of those surviving to live with a limiting longstanding illness (LLSI) in all age  
66 groups, including children and adolescents<sup>[13]</sup>. Adolescents with a limiting longstanding illness  
67 (LLSI) may face difficulties such as hospital appointments, disruptions to their routine and

68 education, and reduced capability to take part in regular activities; these challenges could  
69 lead to mental health difficulties<sup>[14]</sup>. It is important to understand any association between  
70 physical and mental illnesses to inform prevention strategies and paediatric service delivery,  
71 and to understand whether the early provision of psychological support may be necessary for  
72 all children and adolescents with a chronic illness.

73 Previous cross-sectional and longitudinal studies have identified associations between LLSIs  
74 and mental health difficulties in children outside of the UK<sup>[15–17]</sup>. Systematic reviews <sup>[18–20]</sup>  
75 have identified that in adolescents, studies are largely constrained to identifying associations  
76 between diabetes or asthma and mental illness, with some evidence suggesting higher  
77 prevalence of mental health difficulties in those with inflammatory bowel disease, cystic  
78 fibrosis, and sickle cell disease. Further, few studies exploring longitudinal relationships  
79 between longstanding illnesses and mental health difficulties were at a low risk of  
80 methodological bias.

81 An analysis of a UK-based survey (n=9,834) found that children and adolescents aged 5-15  
82 years old with asthma were at a slightly increased odds of anxiety (OR=1.38, 95%CI 1.05-1.82)  
83 and hyperkinetic disorders (OR=1.64, 95%CI 1.00-2.39) when compared with those without  
84 asthma, measured using the Development and Well-Being Assessment<sup>[21]</sup>. Children with  
85 asthma who had parent-rated poor health were at significantly increased odds of scoring as  
86 borderline or abnormal for the parent (OR 3.1, 95%CI 2.4-4.1), teacher (OR 1.7, 95%CI 1.2-  
87 2.4), and child- (OR 1.9, 95%CI 1.2-3.0) rated total difficulties score on the Strengths and  
88 Difficulties Questionnaire, when compared with children without asthma who were in good  
89 health. Those with asthma but were in good health were not at a significantly increased odds

90 of increased score on the Strengths and Difficulties Questionnaire, indicating that increased  
91 symptom severity in children with asthma may lead to increased risk of mental health  
92 difficulties.

93 One UK study (n=14,775) using a secondary analysis of the Avon Longitudinal Study of Parents  
94 and Children found that those with a chronic illness were at an (OR 1.6, 95%CI 1.14-2.25)  
95 increased odds of having mental illness as measured by the Development and Well-Being  
96 Assessment at aged 15 years, compared with those without a chronic illness<sup>[22]</sup>. However,  
97 participants in this study were recruited from a single region in southwestern England, with  
98 those from disadvantaged or ethnic minority backgrounds being under-represented, and  
99 those from white ethnicity and advantaged backgrounds were over-represented.

100 As studies in adults<sup>[23,24]</sup> have previously identified a bi-directional relationship between LLSI  
101 and mental health difficulties seen in other studies, this must be considered when  
102 interpreting estimates from cross-sectional studies. This study therefore explored the  
103 association between having any LLSI before aged 17 years with serious psychological distress  
104 at age 17 years in a large representative UK birth cohort- the Millennium Cohort Study. This  
105 study also investigated the relationship between LLSI and receiving treatment for depression  
106 or serious anxiety.

107

## 108 **Methods**

### 109 **Data source**

110 This study uses a retrospective secondary analysis of data from the Millennium Cohort Study,  
111 a nationally representative UK birth cohort consisting of 19,517 cohort members and their  
112 families. Cohort members were recruited from the Child Benefit Register at age 9 months in  
113 data collection sweep 1 between the years 2000-2002, with some participants whose  
114 geographical data was unavailable recruited in sweep 2 at age 3 years <sup>[25]</sup>. A stratified sampling  
115 design was used, recruiting additional participants from areas with higher rates of minority  
116 ethnic groups and deprivation than the UK average. There are currently 7 sweeps of data;  
117 most recently when cohort members were aged 17 years <sup>[25]</sup>. Parents provided consent to  
118 take part in the study on behalf of cohort members up to age 11 years; from 14 years onwards,  
119 cohort members provided consent themselves.

### 120 **Outcome measures**

121 Cohort members completed the Kessler-self-administered 6-item questionnaire (K6) at age  
122 17 years. The scale is designed to measure non-specific psychological distress, and is scored  
123 from 0-24, with a cut-point of  $\geq 13$  indicating serious distress used frequently throughout the  
124 literature <sup>[26-28]</sup>. All participants with scores between 0-12 were coded as not having  
125 psychological distress, and participants with scores between 12-24 were considered as having  
126 serious psychological distress<sup>[28]</sup>. The K6 has an area under the receiver operating  
127 characteristic curve (AUROC) of 86.5%, compared with 85.4% in the 10-item version of the  
128 Kessler scale (K10), indicating the K6 performs slightly better than the K10 at distinguishing

129 between those with and without serious mental illness<sup>[29]</sup>. The scale demonstrates high  
130 internal consistency, with Cronbach's alpha estimates across varying languages, countries,  
131 and settings ranging from 0.81 to 0.89 in a single factor structure<sup>[29–32]</sup>.

132 At age 17, cohort members were asked 'Has a doctor ever told you that you suffer from  
133 depression or serious anxiety?'. Where cohort members responded with 'yes' they were  
134 further asked 'are you currently being treated for depression or serious anxiety?'. Those who  
135 answered 'yes' to both questions were considered to have an LLSI for the purposes of this  
136 study. This enabled some exploration of contact with healthcare services and treatment.

### 137 **Exposure**

138 LLSI status was gathered on behalf of cohort members from parent/main carer interviews,  
139 between the ages of 3 and 14 years. The parent or main carer of each cohort member was  
140 asked 'Does [cohort member] have a longstanding illness or condition?' at each sweep; for  
141 those who answered 'yes' they were further asked 'Does this illness limit [cohort member]'s  
142 activity in any way?'. For the purposes of this study, respondents whose parent or main carer  
143 answered 'yes' to both questions at any sweep were considered to have an LLSI, and  
144 respondents whose parents answered no to both, or no to the second question were  
145 considered to not have an LLSI, and were used as the reference group. At age 11 and 14 years,  
146 participants who answered 'yes' were also asked which health conditions affect the cohort  
147 member; those who reported being affected exclusively by a mental health condition, and  
148 not by any other condition, were not considered to have an LLSI.

149



## 150 Covariates

151 All covariates were taken from face-to-face interviews with each cohort member's parent or  
152 main carer, at age 9 months for those in the original sample, and age 3 years for those in the  
153 booster sample. Covariates selection for this study was informed by previous studies; all  
154 covariates, are theorised to confound the relationship between LLSI and serious psychological  
155 distress<sup>[33–36]</sup> [see Figure 1]. Covariates were cohort member sex (coded as 0=male,  
156 1=female), ethnic group (coded as 0=White British (reference group), 1=Pakistani and  
157 Bangladeshi, 2= Black or Black British, 3=Mixed or Other Ethnic group), family structure  
158 (coded as 0=dual-parent family, 1=single-parent family), being above or below the 60%  
159 median on the Organisation for Economic Co-operation and Development equivalised income  
160 scale (coded as 0=above median, 1=below median), highest parental National Vocational  
161 Qualification (NVQ) or equivalent (coded as 0=none or overseas qualification, 1=NVQ level 1,  
162 2=NVQ level 2, 3=NVQ level 3, 4=NVQ level 4, 5=NVQ level 5) parental self-reported LLSI  
163 (coded as 0=no LLSI, 1=LLSI present), and parental K6 score (continuous)<sup>[33–36]</sup>.

164 [INSERT FIGURE 1 HERE].

165 Figure 1: Directed acyclic graph of relationships between measured variables in this study

166

167 Note: arrows between confounders have been removed to simplify the presentation of the  
168 DAG

169

## 170 **Statistical analyses**

171 For the primary outcome of psychological distress measured by K6 score, complete-case  
172 analyses were used. Complete case analyses were also used for the secondary outcome of  
173 whether a cohort member reported currently receiving treatment for depression or serious  
174 anxiety. To minimise attrition, participants with LLSI data for at least one sweep were  
175 included, providing that all covariate data were available. Where there was more than one  
176 cohort member in a family, the second cohort member was excluded to prevent clustering by  
177 household. The MCS used a stratified sampling design, over-sampling from electoral wards  
178 with higher levels of ethnic diversity and socioeconomic deprivation in the 1991 UK Census<sup>[37]</sup>.  
179 Sampling and response weights were used to account for both sampling design and attrition  
180 in all analyses.

181 Binary logistic regression was used to produce crude and adjusted odds ratios (ORs) for the  
182 association between LLSI and dichotomised K6 score, and between LLSI and receiving  
183 treatment for depression or serious anxiety. Two-sided statistical tests using a p-value  
184 threshold of <0.05 were used throughout. All covariates listed above were included in  
185 adjusted models for both outcomes, using multiple logistic regression, which were compared  
186 with unadjusted ORs from models using simple binary logistic regression. Additionally, a  
187 sensitivity analysis for the model used for the primary outcome of K6 score was also  
188 conducted using multiple imputation using chained equations (MICE) to impute missing data  
189 for all variables included in the logistic regression model investigating the relationship  
190 between LLSI and K6 score (see Figure 1 for numbers of missing values). All variables used in  
191 the analysis model for the primary outcome were included in the imputation model. The

192 Stata command ‘mi impute chained’ was used to impute 20 datasets. This was used to assess  
193 how the use of complete-case analyses influenced model estimates. All analyses were  
194 conducted in Stata Version 17.

## 195 **Results**

196 Of the 19,482 cohort members in end-user license agreement dataset, 7,866 cohort members  
197 provide complete exposure, outcome, and covariate data, representing 40.4 % of the original  
198 sample.

199 Figure 2: Attrition diagram showing those included in complete-case analyses

200 [INSERT FIGURE 2 HERE]

201 Unweighted cohort member characteristics for the complete-case dataset are presented in  
202 Table 1; weighted figures are available in Appendix S1. 15.8% of cohort members scored  
203 above the threshold for serious distress on the K6, with 21.9% of participants who reported  
204 LLSI before age 17 years scoring above the cutoff, compared with 14.5% in the unexposed  
205 group. Greater proportional differences were seen in receiving treatment for depression or  
206 serious anxiety; 9.7% in those with reported LLSI, compared to 3.5% in those without. Males  
207 had higher prevalence of LLSI, with 53.6% of those reporting an LLSI being male. Those with a  
208 reported LLSI also saw slightly higher prevalence of LLSI in proportions of those from single-  
209 parent families, those below the 60% median equivalised household income threshold, and  
210 those from the White ethnic group, although the study population is also overwhelmingly  
211 white at 88.1%.

212

213 **Table 1: Unweighted summary statistics of covariates by LLSI status in complete case dataset**

| Variable                                      | No LLSI (%)      | LLSI (%)         | Total (%)        |
|-----------------------------------------------|------------------|------------------|------------------|
| <b>Categorical variables</b>                  |                  |                  |                  |
| <b>Sex</b>                                    |                  |                  |                  |
| Female                                        | 3,369 (51.9)     | 640 (46.4)       | 4,009 (51.0)     |
| Male                                          | 3,119 (48.1)     | 738 (53.6)       | 3,857 (49.0)     |
| <b>Ethnic group</b>                           |                  |                  |                  |
| White                                         | 5,696 (87.8)     | 1,227 (89.0)     | 6,923 (88.0)     |
| Indian                                        | 135 (2.1)        | 28 (2.0)         | 163 (2.0)        |
| Pakistani and Bangladeshi                     | 267 (4.1)        | 50 (3.6)         | 317 (4.0)        |
| Black or Black British                        | 159 (2.5)        | 29 (2.1)         | 188 (2.4)        |
| Mixed or Other Ethnic group                   | 231 (3.6)        | 44 (3.2)         | 275 (3.5)        |
| <b>Family structure</b>                       |                  |                  |                  |
| Two parents/carers                            | 5,769 (88.9)     | 1,160 (84.2)     | 6,929 (88.1)     |
| Single parent/carer                           | 719 (11.1)       | 218 (15.8)       | 937 (11.9)       |
| <b>Parental education</b>                     |                  |                  |                  |
| None or overseas qualification                | 642 (9.9)        | 157 (11.4)       | 799 (10.2)       |
| NVQ level 1                                   | 459 (7.1)        | 114 (8.3)        | 573 (7.3)        |
| NVQ level 2                                   | 1,825 (28.1)     | 417 (30.3)       | 2,242 (28.5)     |
| NVQ level 3                                   | 990 (15.3)       | 212 (15.4)       | 1,202 (15.3)     |
| NVQ level 4                                   | 2,258 (34.8)     | 423 (30.7)       | 2,681 (34.1)     |
| NVQ level 5                                   | 314 (4.8)        | 55 (4.0)         | 369 (4.7)        |
| <b>Parental limiting longstanding illness</b> |                  |                  |                  |
| No                                            | 5,217 (80.4)     | 967 (70.2)       | 6,184 (78.6)     |
| Yes                                           | 1,271 (19.6)     | 411 (29.8)       | 1,682 (21.4)     |
| <b>OECD equivalised income</b>                |                  |                  |                  |
| Above 60% median                              | 4,879 (75.2)     | 909 (66.0)       | 5,788 (73.6)     |
| Below 60% median                              | 1,609 (24.8)     | 469 (34.0)       | 2,078 (26.4)     |
| <b>Continuous variables</b>                   |                  |                  |                  |
|                                               | <b>No LLSI</b>   | <b>LLSI</b>      | <b>Total</b>     |
|                                               | <b>mean (SD)</b> | <b>mean (SD)</b> | <b>mean (SD)</b> |
| Parental Kessler-6 score                      | 2.96 (3.40)      | 3.93 (4.20)      | 3.13 (3.57)      |

214

215 **LLSI and serious psychological distress**

216 21.9% (302) of those with an LLSI scored above the threshold for serious psychological distress  
 217 on the Kessler-6 compared with 14.5% (938) of those without an LLSI. The crude OR for serious  
 218 psychological distress at age 17 years in those with LLSI compared to those without was 1.53  
 219 (95%CI 1.29-1.83). The weighted adjusted OR was also 1.53 (95%CI 1.27-1.86). Unweighted  
 220 complete-case analyses can be seen in Appendix S2. Models using MICE to account for missing  
 221 data retained 19,229 cohort members and produced an adjusted OR of 1.58 (95%CI 1.36-  
 222 1.84), which was similar to the estimates from complete-case analyses (Appendix S3).

223 **Table 2: Weighted complete-case multiple logistic regression of dichotomised Kessler-6 score**

| <b>Covariate</b>                              | <b>Weighted adjusted OR</b> | <b>95% CI</b> | <b>P-value</b> |
|-----------------------------------------------|-----------------------------|---------------|----------------|
| <b>Limiting longstanding illness</b>          |                             |               |                |
| No limiting longstanding illness              | 1.00                        |               | (ref)          |
| Limiting longstanding illness                 | 1.53                        | 1.27-1.86     | <0.001         |
| <b>Sex</b>                                    |                             |               |                |
| Female                                        | 1.00                        |               |                |
| Male                                          | 0.37                        | 0.31-0.45     | <0.001         |
| <b>Ethnic group</b>                           |                             |               |                |
| White                                         | 1.00                        |               | (ref)          |
| Indian                                        | 0.43                        | 0.22-0.84     | 0.013          |
| Pakistani/ Bangladeshi                        | 0.59                        | 0.37-0.94     | 0.025          |
| Black/ Black British                          | 1.07                        | 0.51-2.24     | 0.854          |
| Mixed/ Other                                  | 0.89                        | 0.52-1.52     | 0.670          |
| <b>Family structure</b>                       |                             |               |                |
| Dual parents/carers                           | 1.00                        |               | (ref)          |
| Single parent/carer                           | 1.10                        | 0.61-1.49     | 0.561          |
| <b>Parental education</b>                     |                             |               |                |
| None or overseas only                         | 1.00                        |               | (ref)          |
| NVQ level 1                                   | 1.02                        | 0.61-1.70     | 0.942          |
| NVQ level 2                                   | 0.99                        | 0.71-1.40     | 0.968          |
| NVQ level 3                                   | 1.00                        | 0.69-1.47     | 0.983          |
| NVQ level 4                                   | 0.94                        | 0.66-1.33     | 0.733          |
| NVQ level 5                                   | 0.94                        | 0.60-1.34     | 0.779          |
| <b>OECD equivalised income</b>                |                             |               |                |
| Above 60% median                              | 1.00                        |               | (ref)          |
| Below 60% median                              | 1.17                        | 0.97-1.41     | 0.108          |
| <b>Parental limiting longstanding illness</b> |                             |               |                |
| No                                            | 1.00                        |               | (ref)          |
| Yes                                           | 1.08                        | 0.89-1.30     | 0.423          |
| <b>Parental Kessler-6 score</b>               | 1.04                        | 1.02-1.07     | <0.001         |
| <b>Constant</b>                               | 0.22                        | 0.15-0.31     | <0.001         |

224 *Cutoff Kessler-6 score of  $\geq 13$  used to indicate serious psychological distress*

225 **LLSI and treatment for depression or serious anxiety**

226 9.7% (134) of those with an LLSI reported currently receiving treatment for depression or  
 227 serious anxiety, compared with just 3.5% (225) in those without an LLSI. The crude OR for  
 228 children and adolescents who reported currently receiving treatment for depression or  
 229 serious anxiety by age 17 years in those with an LLSI compared to those without was 3.18

230 (95%CI 2.40-4.22), and the adjusted value was 3.02 (95%CI 2.24-4.07). Unweighted complete-  
 231 case analyses can be seen in Appendix S4.

232 Table 3: Weighted complete-case logistic regression of currently receiving treatment for  
 233 depression or serious anxiety

| <b>Covariate</b>                              |                             |               |                |
|-----------------------------------------------|-----------------------------|---------------|----------------|
|                                               | <b>Weighted adjusted OR</b> | <b>95% CI</b> | <b>P-value</b> |
| <b>Limiting longstanding illness</b>          |                             |               |                |
| No limiting longstanding illness              | 1.00                        |               | (ref)          |
| Limiting longstanding illness                 | 3.02                        | 2.24-4.07     | <0.001         |
| <b>Sex</b>                                    |                             |               |                |
| Female                                        | 1.00                        |               |                |
| Male                                          | 0.29                        | 0.21-0.39     | <0.001         |
| <b>Ethnic group</b>                           |                             |               |                |
| White                                         | 1.00                        |               | (ref)          |
| Indian                                        | 0.67                        | 0.16-2.71     | 0.572          |
| Pakistani/ Bangladeshi                        | 0.32                        | 0.12-0.86     | 0.025          |
| Black/ Black British                          | 0.48                        | 0.14-1.64     | 0.241          |
| Mixed/ Other                                  | 0.22                        | 0.07-0.70     | 0.010          |
| <b>Family structure</b>                       |                             |               |                |
| Dual parents/carers                           | 1.00                        |               | (ref)          |
| Single parent/carer                           | 0.79                        | 0.46-1.36     | 0.398          |
| <b>Parental education</b>                     |                             |               |                |
| None or overseas only                         | 1.00                        |               | (ref)          |
| NVQ level 1                                   | 1.28                        | 0.69-2.38     | 0.435          |
| NVQ level 2                                   | 0.80                        | 0.47-1.33     | 0.384          |
| NVQ level 3                                   | 0.61                        | 0.35-1.08     | 0.087          |
| NVQ level 4                                   | 0.71                        | 0.43-1.17     | 0.173          |
| NVQ level 5                                   | 0.97                        | 0.49-1.90     | 0.921          |
| <b>OECD equivalised income</b>                |                             |               |                |
| Above 60% median                              | 1.00                        |               | (ref)          |
| Below 60% median                              | 1.09                        | 0.76-1.55     | 0.646          |
| <b>Parental limiting longstanding illness</b> |                             |               |                |
| No                                            | 1.00                        |               | (ref)          |
| Yes                                           | 1.35                        | 0.98-1.86     | 0.069          |
| <b>Parental Kessler-6 score</b>               |                             |               |                |
|                                               | 1.06                        | 1.02-1.09     | 0.003          |
| <b>Constant</b>                               | 0.06                        | 0.04-0.09     | <0.001         |

234

## 235 Discussion

236 This was the first UK-wide longitudinal study investigating the relationship between LLSI and  
 237 psychological distress. This study found that children and adolescents with a known history

238 of LLSI had an odds of 1.53 having serious psychological distress at age 17, when compared  
239 with those without an LLSI. Those with a known history of LLSI had an odds of 3.02 for  
240 reporting currently receiving treatment for depression or serious anxiety by a healthcare  
241 professional at age 17 years, when compared with those without an LLSI.

242 The weighted prevalence of LLSI in this study of 15.7% (Appendix S1) is greater than that seen  
243 in national survey data for children aged 0-15 years in a comparable time period such as The  
244 Health Survey for England at 8% [38]. The use of a longitudinal measure of LLSI in this study,  
245 which placed those with any history of self-reporting an LLSI in the exposure group may be  
246 responsible for some of this difference. Varying age ranges, areas, and definitions of LLSI  
247 across studies also make between-studies comparison of LLSI prevalence difficult, with other  
248 England surveys showing higher rates at 23% [39].

249 All LLSI data were taken before both outcome measurements at age 17 years. Those who  
250 reported having an LLSI at age 11-14 years, but self-categorised this as only having a mental  
251 health condition with no other type of LLSI were excluded from the exposure group for the  
252 purposes of this study. However, some participants were missing data at these sweeps, so it  
253 is not possible to assess the mental health status of some participants between the ages of  
254 11-14 years. The longitudinal design of the current study therefore does facilitate some causal  
255 interpretation to indicate that LLSI may increase the risk of serious psychological distress, and  
256 of receiving treatment for depression or serious anxiety at age 17 years. Mediation analyses  
257 and assessment of dose-response relationships, such as severity or duration of LLSI in other  
258 populations could further explore this.

259

260 This study identified a greater proportion of adolescents with recent serious nonspecific  
261 psychological distress (15.8%) than those who were undergoing treatment for depression or  
262 serious anxiety (4.6%). This could indicate underdiagnosis of depression and serious anxiety,  
263 although some cohort members could have experienced psychological distress without  
264 meeting the threshold for treatment for depression or serious anxiety. It is important for  
265 healthcare practitioners to be aware of the increased psychological distress in adolescents  
266 with an LLSI. A separate pilot study implemented routine screening and an early stepped  
267 intervention pathway into a paediatric epilepsy clinic and was able to identify children with  
268 previously unidentified mental health difficulties and enable them to appropriately access  
269 care <sup>[46]</sup>. In another study, routine depression screening in adolescents with type 1 diabetes  
270 mellitus at quarterly appointments in a Cincinnati Children's Hospital was able to detect  
271 depression symptoms early and create opportunities for early intervention <sup>[47]</sup>. As the current  
272 study identified increased odds of serious psychological distress or of receiving treatment for  
273 depression or serious anxiety, it may be beneficial to screen for psychological distress and  
274 provide early interventions more broadly in adolescents with any LLSI, to facilitate early  
275 detection of mental health difficulties. Future studies could investigate the relationship  
276 between contact with health professionals and diagnosis and treatment of mental health  
277 difficulties to understand this further, and to improve access to mental health support in  
278 young people.

279 The OR for receiving treatment for serious depression or anxiety (3.02) was greater than when  
280 measuring serious psychological distress using the K6 (1.53). As LLSIs often require treatment  
281 or regular monitoring, adolescents with an LLSI may have increased contact with healthcare  
282 professionals when compared with their peers. This may lead to increased opportunity for



283 healthcare professionals to identify mental health difficulties in children and young people  
284 with LLSIs. It is possible that those without LLSIs may constitute a larger proportion of those  
285 with undiagnosed mental health difficulties. Further exploration of the potential benefits of  
286 screening for psychological distress outside of those with an LLSI may also be useful for the  
287 early identification of mental health difficulties.

288 This study adjusted for the effects of ethnicity in all adjusted models, however, the  
289 representativeness of some ethnic minority groups in the Millennium Cohort Study is limited.  
290 Previous literature has shown that young people from ethnic minority and socioeconomically  
291 deprived backgrounds face substantial barriers to accessing quality support to manage their  
292 physical and mental health<sup>[48]</sup>. Future research could examine whether the association found  
293 here varies across different ethnic groups, to establish whether the association may be  
294 stronger for groups who have more difficulties with managing their mental health.

295 The increased odds of serious psychological distress in those with an LLSI in this study is  
296 comparable to odds ratios from the previously mentioned UK studies investigating  
297 associations between chronic illness and mental illness (1.6)<sup>[22]</sup> and asthma and mental illness  
298 (1.38)<sup>[21]</sup>. The consistency of results suggests that the risk of mental illness may be higher for  
299 children with any LLSI. However, the added benefit of this study was the use of a longitudinal  
300 design in a more representative UK sample, covering a broader range of LLSIs than those seen  
301 in previous studies.

302 Although this study has found increased odds of mental health difficulties in adolescents with  
303 an LLSI, it is important to consider the moderating and potentially neutralising effects of  
304 family support, education, and management of the physical condition itself before

305 considering mental health interventions. Adolescence often marks the transition from parent-  
306 to self-management of LLSI, with differences in the age this occurs seen across individuals and  
307 conditions <sup>[40]</sup>. As a result of this and other developmental and environmental changes, non-  
308 adherence to treatments across illnesses including asthma <sup>[41]</sup> and diabetes <sup>[42]</sup> is particularly  
309 high in adolescents. This is concerning, as non-adherence with treatment of LLSI may  
310 exacerbate symptoms or illness progression; it is possible that this could also have adverse  
311 effects on mental health outcomes. The reverse may also be true – a systematic review  
312 identified that adolescents self-reported that poor mental health made it more difficult to  
313 adhere to treatment for physical illnesses <sup>[43]</sup>. Few studies appear to have examined the  
314 mental health implications of improving LLSI treatment adherence in adolescents. As  
315 smartphone use becomes increasingly popular, one study found that a Mobile-health app  
316 which included symptom monitoring questionnaires, medication reminders, information  
317 videos, and capacity to talk to pharmacists or peers improved treatment adherence in  
318 adolescents with a low adherence at baseline <sup>[44]</sup>. A trial found that adolescents with type 1  
319 diabetes who had received motivational interviewing had improved glycaemic control and life  
320 satisfaction, and had reduced worry <sup>[45]</sup>. Future studies could further explore the mental  
321 health impacts of comparable interventions and alternative approaches such as coaching  
322 across other chronic conditions.

323

#### 324 **Strengths and limitations**

325 This study has several strengths. The Millennium Cohort Study provided a large nationally  
326 representative UK sample, with a prospective study design which reduced recall bias

327 compared to a single cross-sectional analysis, and sufficient demographic and socioeconomic  
328 information for use as confounding variables.

329 This study also has some limitations. The high attrition rate and use of complete case analysis  
330 in this study meant that 41% of singleton cohort members recruited to the Millennium Cohort  
331 Study were included in the complete-case analyses. This may reduce the representativeness  
332 of results and lead to attrition bias. Although sensitivity analyses using multiple imputation  
333 by chained equations to account for missingness did not lead to substantial changes in model  
334 estimates, if the missing at random assumption does not hold, then estimates using multiple  
335 imputation are also likely to be biased<sup>[49]</sup>.

336 Prior to age 11 years, parents and carers were not asked what type of health condition cohort  
337 members were affected by. This may have led to some cohort members with a limiting  
338 mental health condition prior and no LLSI prior to age 11 years being misclassified as having  
339 an LLSI, which may have inflated the relationship between LLSI and serious psychological  
340 distress in this study.

## 341 **Conclusion**

342 This was the first large-scale longitudinal study to investigate the relationship between LLSI  
343 and psychological distress in a representative sample of UK adolescents. This study found that  
344 children and adolescents with a known LLSI are at an increased risk of serious psychological  
345 distress and of currently receiving treatment for depression or serious anxiety at age 17 years  
346 when compared with those without an LLSI. Working alongside young people to provide  
347 support, improve treatment adherence, and routinely screen for and identify psychological  
348 distress in young people with any LLSI may be beneficial.

349 **Acknowledgements**

350 **Author contributions**

351 Substantial contributions to conception and design, acquisition of data, or analysis and  
352 interpretation of data: Palliser, G.M., Fraser, L.K., Mooney, K.L., and Jarvis, S.W.

353 Drafting the article or revising it critically for important intellectual content: Palliser, G.M.,  
354 Fraser, L.K., Mooney, K.L., and Jarvis, S.W.

355 Final approval of the version to published: Palliser, G.M., Fraser, L.K., Mooney, K.L., and  
356 Jarvis, S.W.

357 **Competing interests**

358 The authors have no competing interests to declare.

359 **Consent statement**

360 This study only included data from the Millennium Cohort Study, which have previously  
361 obtained consent from all participants. No additional patient consent was required to  
362 conduct the secondary analyses in this study.

363 **Data availability**

364 The study data are freely available from the UK Data Service, under an End User Licence  
365 Agreement. Data can be obtained from

366 <https://beta.ukdataservice.ac.uk/datacatalogue/series/series?id=2000031>

367

## 368 References

- 369 **1** Newlove-Delgado T, Williams T, Robertson K, McManus S, Sadler K, Vizard T, Cartwright  
370 C, Mathews F, Norman S, Marcheselli F, Ford T. Mental health of children and young  
371 people in England. Leeds: NHS Digital Available from:  
372 [https://files.digital.nhs.uk/97/B09EF8/mhcyp\\_2021\\_rep.pdf#](https://files.digital.nhs.uk/97/B09EF8/mhcyp_2021_rep.pdf#)
- 373 **2** Bebbington PE, McManus S. Revisiting the one in four: the prevalence of psychiatric  
374 disorder in the population of England 2000–2014. *Br J Psychiatry* 2020; **216**: 55–57.  
375 [DOI: 10.1192/bjp.2019.196]
- 376 **3** Mental Health of Children and Young People in England 2021 - wave 2 follow up to the  
377 2017 survey. NHS England Digital. Available from: [https://digital.nhs.uk/data-and-](https://digital.nhs.uk/data-and-information/publications/statistical/mental-health-of-children-and-young-people-in-england/2021-follow-up-to-the-2017-survey)  
378 [information/publications/statistical/mental-health-of-children-and-young-people-in-](https://digital.nhs.uk/data-and-information/publications/statistical/mental-health-of-children-and-young-people-in-england/2021-follow-up-to-the-2017-survey)  
379 [england/2021-follow-up-to-the-2017-survey](https://digital.nhs.uk/data-and-information/publications/statistical/mental-health-of-children-and-young-people-in-england/2021-follow-up-to-the-2017-survey)
- 380 **4** Mental Health of Children and Young People in England, 2023 - wave 4 follow up to the  
381 2017 survey. NHS England Digital. Available from: [https://digital.nhs.uk/data-and-](https://digital.nhs.uk/data-and-information/publications/statistical/mental-health-of-children-and-young-people-in-england/2023-wave-4-follow-up)  
382 [information/publications/statistical/mental-health-of-children-and-young-people-in-](https://digital.nhs.uk/data-and-information/publications/statistical/mental-health-of-children-and-young-people-in-england/2023-wave-4-follow-up)  
383 [england/2023-wave-4-follow-up](https://digital.nhs.uk/data-and-information/publications/statistical/mental-health-of-children-and-young-people-in-england/2023-wave-4-follow-up)
- 384 **5** Kessler RC, Berglund P, Demler O, Jin R, Merikangas KR, Walters EE. Lifetime Prevalence  
385 and Age-of-Onset Distributions of DSM-IV Disorders in the National Comorbidity Survey  
386 Replication. *Archives of General Psychiatry* 2005; **62**: 593–602. [DOI:  
387 10.1001/archpsyc.62.6.593]
- 388 **6** American Psychiatric Association. Diagnostic and statistical manual of mental disorders,  
389 4th edition. 4th ed. Washington, D.C.: American Psychiatric Association
- 390 **7** Agnafors S, Barmark M, Sydsjö G. Mental health and academic performance: a study on  
391 selection and causation effects from childhood to early adulthood. *Soc Psychiatry*  
392 *Psychiatr Epidemiol* 2021; **56**: 857–866. [DOI: 10.1007/s00127-020-01934-5]
- 393 **8** Meier MH, Hall W, Caspi A, Belsky DW, Cerdá M, Harrington H, Houts R, Poulton R,  
394 Moffitt TE. Which adolescents develop persistent substance dependence in adulthood?  
395 Using population-representative longitudinal data to inform universal risk assessment.  
396 *Psychol Med* 2016; **46**: 877–889. [PMID: 26620720 DOI: 10.1017/S0033291715002482]
- 397 **9** Hards E, Loades ME, Higson-Sweeney N, Shafran R, Serafimova T, Brigden A, Reynolds S,  
398 Crawley E, Chatburn E, Linney C, McManus M, Borwick C. Loneliness and mental health  
399 in children and adolescents with pre-existing mental health problems: A rapid  
400 systematic review. *British Journal of Clinical Psychology* 2022; **61**: 313–334. [DOI:  
401 10.1111/bjc.12331]
- 402 **10** Manor I, Gutnik I, Ben-Dor DH, Apter A, Sever J, Tyano S, Weizman A, Zalsman G.  
403 Possible association between attention deficit hyperactivity disorder and attempted  
404 suicide in adolescents - a pilot study. *Eur Psychiatry* 2010; **25**: 146–150. [PMID:  
405 19699060 DOI: 10.1016/j.eurpsy.2009.06.001]

- 406 **11** Department of Health. Long term conditions compendium of information. Leeds:  
407 Department of Health Available from:  
408 [https://assets.publishing.service.gov.uk/government/uploads/system/uploads/attachm](https://assets.publishing.service.gov.uk/government/uploads/system/uploads/attachment_data/file/216528/dh_134486.pdf)  
409 [ent\\_data/file/216528/dh\\_134486.pdf](https://assets.publishing.service.gov.uk/government/uploads/system/uploads/attachment_data/file/216528/dh_134486.pdf)
- 410 **12** Child and infant mortality in England and Wales - Office for National Statistics. 2021.  
411 Available from:  
412 [https://www.ons.gov.uk/peoplepopulationandcommunity/birthsdeathsandmarriages/d](https://www.ons.gov.uk/peoplepopulationandcommunity/birthsdeathsandmarriages/deaths/bulletins/childhoodinfantandperinatalmortalityinenglandandwales/2021#trends-in-child-and-infant-mortality)  
413 [eaths/bulletins/childhoodinfantandperinatalmortalityinenglandandwales/2021#trends-](https://www.ons.gov.uk/peoplepopulationandcommunity/birthsdeathsandmarriages/deaths/bulletins/childhoodinfantandperinatalmortalityinenglandandwales/2021#trends-in-child-and-infant-mortality)  
414 [in-child-and-infant-mortality](https://www.ons.gov.uk/peoplepopulationandcommunity/birthsdeathsandmarriages/deaths/bulletins/childhoodinfantandperinatalmortalityinenglandandwales/2021#trends-in-child-and-infant-mortality)
- 415 **13** Anderson E, Durstine JL. Physical activity, exercise, and chronic diseases: A brief review.  
416 *Sports Medicine and Health Science* 2019; **1**: 3–10. [DOI: 10.1016/j.smhs.2019.08.006]
- 417 **14** Allen T, Reda S, Martin S, Long P, Franklin A, Bedoya SZ, Wiener L, Wolters PL. The Needs  
418 of Adolescents and Young Adults with Chronic Illness: Results of a Quality Improvement  
419 Survey. *Children (Basel)* 2022; **9**: 500. [PMID: 35455544 DOI: 10.3390/children9040500]
- 420 **15** Delamater AM, Guzman A, Aparicio K. Mental health issues in children and adolescents  
421 with chronic illness. *International Journal of Human Rights in Healthcare* 2017; **10**: 163–  
422 173. [DOI: 10.1108/IJHRH-05-2017-0020]
- 423 **16** Ferro MA, Gorter JW, Boyle MH. Trajectories of depressive symptoms during the  
424 transition to young adulthood: The role of chronic illness. *Journal of Affective Disorders*  
425 2015; **174**: 594–601. [DOI: 10.1016/j.jad.2014.12.014]
- 426 **17** Speechley KN, Ferro MA, Camfield CS, Huang W, Levin SD, Smith ML, Wiebe S, Zou G.  
427 Quality of life in children with new-onset epilepsy. *Neurology* 2012; **79**: 1548–1555.  
428 [DOI: 10.1212/WNL.0b013e31826e25aa]
- 429 **18** Zheng K, Abraham C, Bruzzese J-M, Smaldone A. Longitudinal Relationships between  
430 Depression and Chronic Illness in Adolescents: An Integrative Review. *J Pediatr Health*  
431 *Care* 2020; **34**: 333–345. [PMID: 32171610 DOI: 10.1016/j.pedhc.2020.01.008]
- 432 **19** Cobham VE, Hickling A, Kimball H, Thomas HJ, Scott JG, Middeldorp CM. Systematic  
433 Review: Anxiety in Children and Adolescents With Chronic Medical Conditions. *Journal*  
434 *of the American Academy of Child & Adolescent Psychiatry* 2020; **59**: 595–618. [DOI:  
435 10.1016/j.jaac.2019.10.010]
- 436 **20** Brady AM, Deighton J, Stansfeld S. Psychiatric outcomes associated with chronic illness  
437 in adolescence: A systematic review. *Journal of Adolescence* 2017; **59**: 112–123. [DOI:  
438 10.1016/j.adolescence.2017.05.014]
- 439 **21** Calam R, Gregg L, Goodman R. Psychological Adjustment and Asthma in Children and  
440 Adolescents: The UK Nationwide Mental Health Survey. *Psychosomatic Medicine* 2005;  
441 **67**: 105–110. [DOI: 10.1097/01.psy.0000151490.77622.37]

- 442 **22** Brady AM, Deighton J, Stansfeld S. Chronic illness in childhood and early adolescence: A  
443 longitudinal exploration of co-occurring mental illness. *Development and*  
444 *Psychopathology* 2021; **33**: 885–898. [DOI: 10.1017/S0954579420000206]
- 445 **23** Mersha AG, Tollosa DN, Bagade T, Eftekhari P. A bidirectional relationship between  
446 diabetes mellitus and anxiety: A systematic review and meta-analysis. *Journal of*  
447 *Psychosomatic Research* 2022; **162**: 110991. [DOI: 10.1016/j.jpsychores.2022.110991]
- 448 **24** Grassi L, Riba M. Cancer and severe mental illness: Bi-directional problems and potential  
449 solutions. *Psycho-Oncology* 2020; **29**: 1445–1451. [DOI: 10.1002/pon.5534]
- 450 **25** Centre for Longitudinal Studies. Millennium Cohort Study User Guide: Surveys 1-5, 9th  
451 edn. London: Centre for Longitudinal Studies Available from:  
452 [http://doc.ukdataservice.ac.uk/doc/5795/mrdoc/pdf/mcs1-5\\_user\\_guide\\_ed9\\_2020-](http://doc.ukdataservice.ac.uk/doc/5795/mrdoc/pdf/mcs1-5_user_guide_ed9_2020-08-07.pdf)  
453 [08-07.pdf](http://doc.ukdataservice.ac.uk/doc/5795/mrdoc/pdf/mcs1-5_user_guide_ed9_2020-08-07.pdf)
- 454 **26** Hope S, Deighton J, Micali N, Law C. Maternal mental health and childhood injury:  
455 evidence from the UK Millennium Cohort Study. *Arch Dis Child* 2019; **104**: 268–274.  
456 [DOI: 10.1136/archdischild-2017-313809]
- 457 **27** Rosenberg AR, Bradford MC, McCauley E, Curtis JR, Wolfe J, Baker KS, Yi-Frazier JP.  
458 Promoting resilience in adolescents and young adults with cancer: Results from the  
459 PRISM randomized controlled trial. *Cancer* 2018; **124**: 3909–3917. [DOI:  
460 10.1002/cncr.31666]
- 461 **28** Peiper N, Clayton R, Wilson R, Illback R. The performance of the K6 Scale in a large  
462 school sample. *Psychological Assessment* 2015; **27**: 228. [DOI: 10.1037/pas0000025]
- 463 **29** Kessler R C, Barker P R, Colpe L J, Epstein J F, Gfroerer J C, Hiripi E, Howes M J, Normand  
464 S-L T, Manderscheid R W, Walters E E, Zaslavsky A M. Screening for serious mental  
465 illness in the general population. *Arch Gen Psychiatry* 2003; **60**: 184–189. [DOI:  
466 10.1001/archpsyc.60.2.184]
- 467 **30** Hajebi A, Motevalian A, Amin-Esmaeili M, Rahimi-Movaghar A, Sharifi V, Hoseini L,  
468 Shadloo B, Mojtabei R. Adaptation and validation of short scales for assessment of  
469 psychological distress in Iran: The Persian K10 and K6. *Int J Methods Psychiatr Res* 2018;  
470 **27**: e1726. [PMID: 29888523 DOI: 10.1002/mpr.1726]
- 471 **31** Easton SD, Safadi NS, Wang Y, Hasson RG. The Kessler psychological distress scale:  
472 translation and validation of an Arabic version. *Health Qual Life Outcomes* 2017; **15**:  
473 215. [PMID: 29078774 DOI: 10.1186/s12955-017-0783-9]
- 474 **32** Sakurai K, Nishi A, Kondo K, Yanagida K, Kawakami N. Screening performance of K6/K10  
475 and other screening instruments for mood and anxiety disorders in Japan. *Psychiatry*  
476 *and Clinical Neurosciences* 2011; **65**: 434–441. [DOI: 10.1111/j.1440-1819.2011.02236.x]
- 477 **33** Yang M, Carson C, Creswell C, Violato M. Child mental health and income gradient from  
478 early childhood to adolescence: Evidence from the UK. *SSM Popul Health* 2023; **24**:  
479 101534. [PMID: 37954013 DOI: 10.1016/j.ssmph.2023.101534]

- 480 **34** Straatmann VS, Lai E, Lange T, Campbell MC, Wickham S, Andersen A-MN, Strandberg-  
481 Larsen K, Taylor-Robinson D. How do early-life factors explain social inequalities in  
482 adolescent mental health? Findings from the UK Millennium Cohort Study. *J Epidemiol*  
483 *Community Health* 2019; **73**: 1049–1060. [PMID: 31492761 DOI: 10.1136/jech-2019-  
484 212367]
- 485 **35** Patalay P, Fitzsimons E. Development and predictors of mental ill-health and wellbeing  
486 from childhood to adolescence. *Soc Psychiatry Psychiatr Epidemiol* 2018; **53**: 1311–  
487 1323. [DOI: 10.1007/s00127-018-1604-0]
- 488 **36** Ferro MA, Boyle MH. The Impact of Chronic Physical Illness, Maternal Depressive  
489 Symptoms, Family Functioning, and Self-esteem on Symptoms of Anxiety and  
490 Depression in Children. *J Abnorm Child Psychol* 2015; **43**: 177–187. [DOI:  
491 10.1007/s10802-014-9893-6]
- 492 **37** Plewis I. Technical Report on Sampling 4th Edition. London: Centre for Longitudinal  
493 Studies
- 494 **38** NHS Digital. Health Survey for England, 2019: Data tables. NHS Digital. 2020. Available  
495 from: [https://digital.nhs.uk/data-and-information/publications/statistical/health-](https://digital.nhs.uk/data-and-information/publications/statistical/health-survey-for-england/2019/health-survey-for-england-2019-data-tables)  
496 [survey-for-england/2019/health-survey-for-england-2019-data-tables](https://digital.nhs.uk/data-and-information/publications/statistical/health-survey-for-england/2019/health-survey-for-england-2019-data-tables)
- 497 **39** Brooks F, Klemere E, Chester K, Magnusson J, Spencer N. Health behaviour in school  
498 aged children. Hertfordshire: Centre for Research in Public Health and Community Care  
499 Available from: [http://hbscengland.org/wp-content/uploads/2020/01/HBSC-England-](http://hbscengland.org/wp-content/uploads/2020/01/HBSC-England-National-Report-2020.pdf)  
500 [National-Report-2020.pdf](http://hbscengland.org/wp-content/uploads/2020/01/HBSC-England-National-Report-2020.pdf)
- 501 **40** Lerch MF, Thrane SE. Adolescents with chronic illness and the transition to self-  
502 management: A systematic review. *Journal of Adolescence* 2019; **72**: 152–161. [DOI:  
503 10.1016/j.adolescence.2019.02.010]
- 504 **41** Morton RW, Everard ML, Elphick HE. Adherence in childhood asthma: the elephant in  
505 the room. *Archives of Disease in Childhood* 2014; **99**: 949–953. [PMID: 24876303 DOI:  
506 10.1136/archdischild-2014-306243]
- 507 **42** Shah R, McKay SV, Levitt Katz LE, ghormli LE, Anderson BJ, Casey TL, Higgins L, Izquierdo  
508 R, Wauters AD, Chang N. Adherence to multiple medications in the TODAY (Treatment  
509 Options for type 2 Diabetes in Adolescents and Youth) cohort: effect of additional  
510 medications on adherence to primary diabetes medication. *J Pediatr Endocrinol Metab*  
511 2020; **33**: 191–198. [PMID: 31809265 DOI: 10.1515/jpem-2019-0315]
- 512 **43** Hanghøj S, Boisen KA. Self-Reported Barriers to Medication Adherence Among  
513 Chronically Ill Adolescents: A Systematic Review. *Journal of Adolescent Health* 2014; **54**:  
514 121–138. [DOI: 10.1016/j.jadohealth.2013.08.009]
- 515 **44** Kosse RC, Bouvy ML, Belitser SV, Vries TW de, Wal PS van der, Koster ES. Effective  
516 Engagement of Adolescent Asthma Patients With Mobile Health–Supporting Medication  
517 Adherence. *JMIR mHealth and uHealth* 2019; **7**: e12411. [DOI: 10.2196/12411]



- 518 **45** Channon SJ, Huws-Thomas MV, Rollnick S, Hood K, Cannings-John RL, Rogers C, Gregory  
519 JW. A Multicenter Randomized Controlled Trial of Motivational Interviewing in  
520 Teenagers With Diabetes. *Diabetes Care* 2007; **30**: 1390–1395. [DOI: 10.2337/dc06-  
521 2260]
- 522 **46** George C, Felix SA, McLellan A, Shetty J, Middleton J, Chin RF, Poveda B, Brand C, Small  
523 M, Verity K. Pilot project of psychological services integrated into a pediatric epilepsy  
524 clinic: Psychology Adding Value – Epilepsy Screening (PAVES). *Epilepsy Behav* 2021; **120**.  
525 [PMID: 33971391 DOI: 10.1016/j.yebeh.2021.107968]
- 526 **47** Corathers S, Mara CA, Chundi PK, Kichler JC. Depression Screening of Adolescents With  
527 Diabetes: 5-Years of Implementation and Outcomes. *Journal of the American Academy*  
528 *of Child & Adolescent Psychiatry* 2019; **58**: 628–632. [PMID: 30802493 DOI:  
529 10.1016/j.jaac.2019.01.013]
- 530 **48** Chauhan A, Walton M, Manias E, Walpola RL, Seale H, Latanik M, Leone D, Mears S,  
531 Harrison R. The safety of health care for ethnic minority patients: a systematic review.  
532 *International Journal for Equity in Health* 2020; **19**: 118. [DOI: 10.1186/s12939-020-  
533 01223-2]
- 534 **49** Mera-Gaona M, Neumann U, Vargas-Canas R, López DM. Evaluating the impact of  
535 multivariate imputation by MICE in feature selection. *PLoS One* 2021; **16**: e0254720.  
536 [PMID: 34320016 DOI: 10.1371/journal.pone.0254720]
- 537

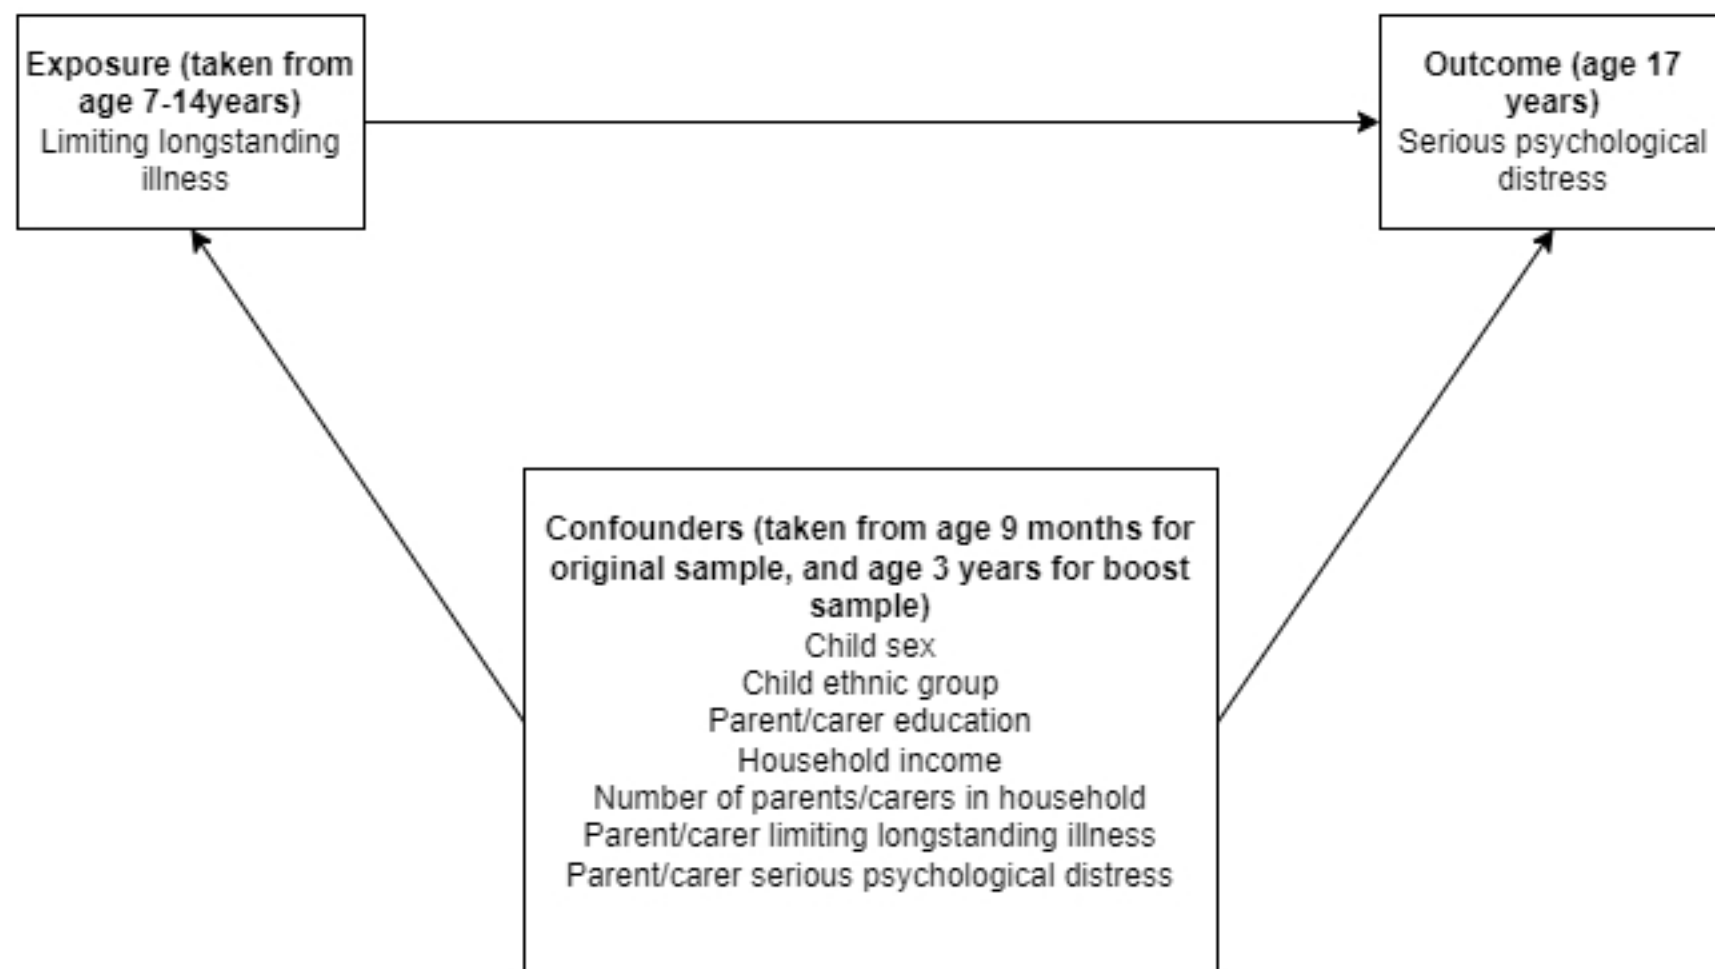

Figure 1- Simplified DAG

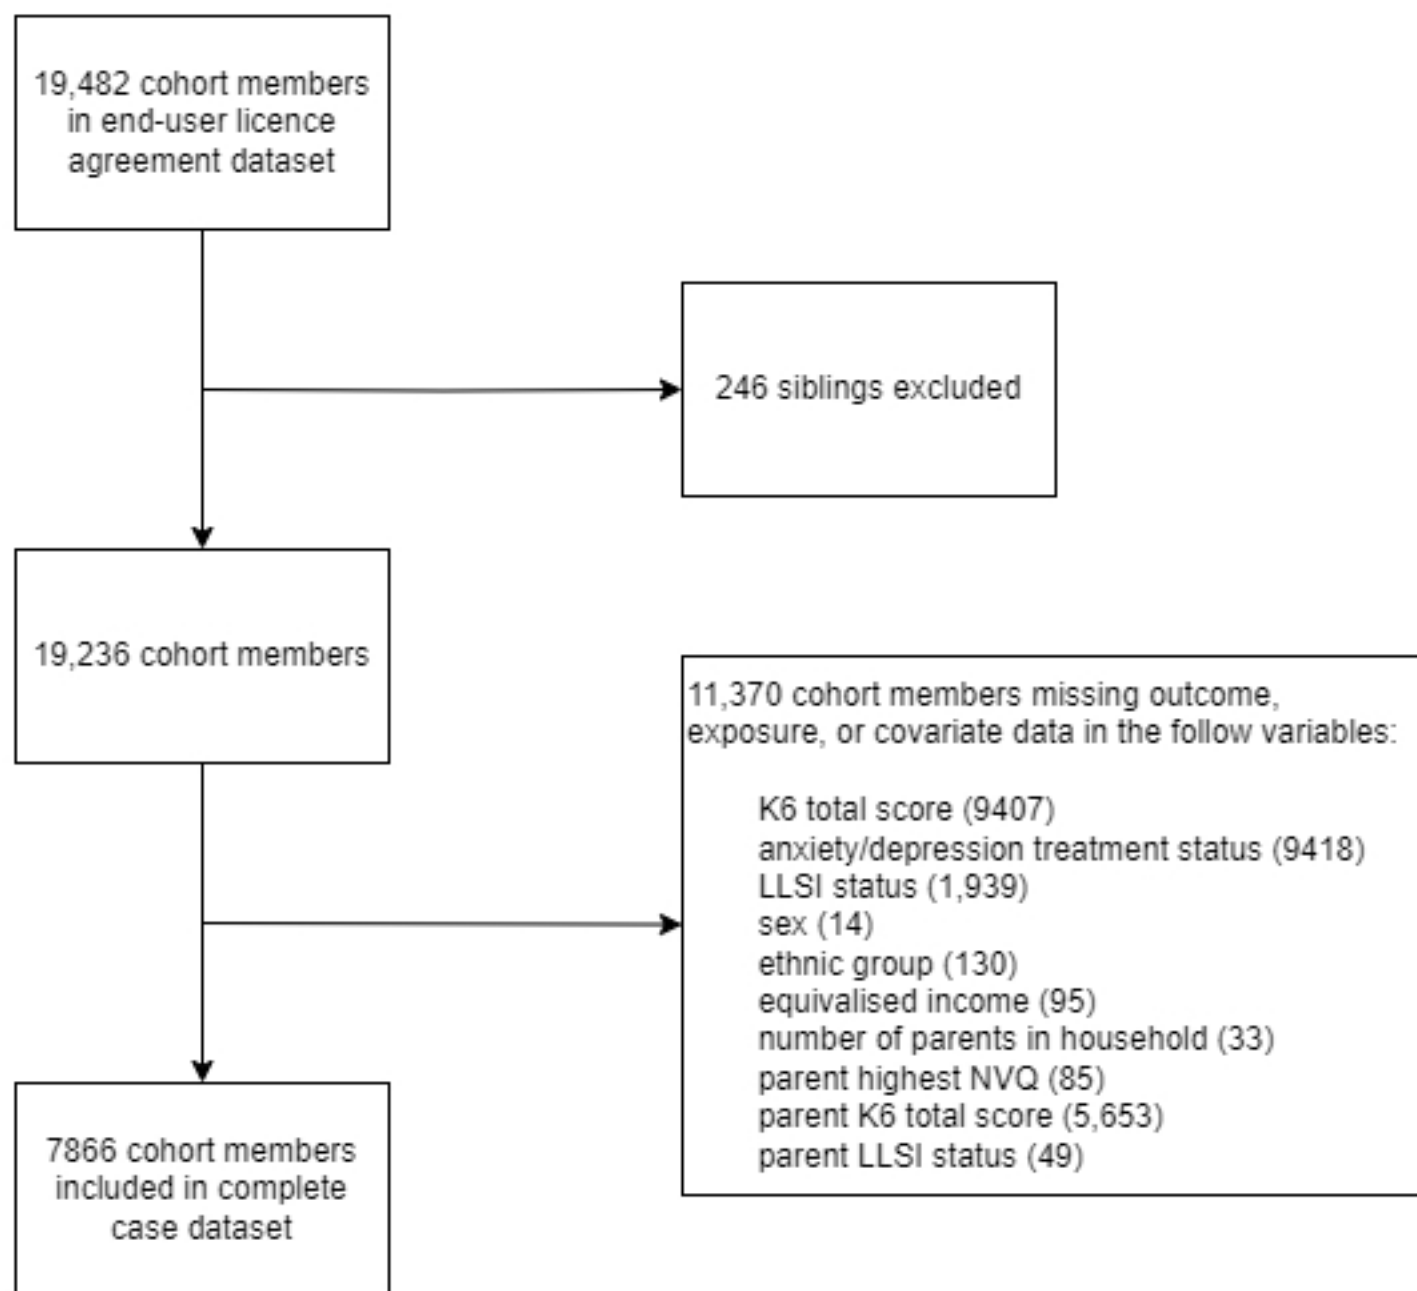

Figure 2- Attrition Diagram
